# Supplementary material
Source: Research Square preprint supplement (doi:10.21203/rs.3.rs-9740919/v1)
Supplement: Supplementary file 1 [file 90c60950366bbec1231c45d1.pdf]

# Supplementary information for ADNIC validation experiments

## Overview

These supplementary tables summarize the validation experiments used to evaluate robustness, imbalance handling, component contribution, backbone choice, and training-configuration sensitivity. The expanded validation suite contained 110 completed model-training and evaluation tasks, with no failed runs. Unless otherwise noted, values in repeated-seed or cross-validation tables are reported as mean  $\pm$  standard deviation.

Table S1: Repeated-seed comparison of representative methods on the held-out test split

| Method                                 | Seeds | Overall Acc. (%) | Macro F1            | Period 3 F1         |
|----------------------------------------|-------|------------------|---------------------|---------------------|
| EfficientNetV2-S + CE                  | 10    | 86.52 $\pm$ 5.34 | 0.7435 $\pm$ 0.0873 | 0.4602 $\pm$ 0.2275 |
| EfficientNetV2-S + fixed Focal Loss    | 10    | 85.94 $\pm$ 2.56 | 0.7404 $\pm$ 0.0599 | 0.4547 $\pm$ 0.1724 |
| EfficientNetV2-S + adaptive Focal Loss | 10    | 86.67 $\pm$ 4.31 | 0.7694 $\pm$ 0.0836 | 0.5418 $\pm$ 0.2015 |
| Single-stage contrastive ADNIC         | 10    | 87.97 $\pm$ 3.81 | 0.7812 $\pm$ 0.0486 | 0.5408 $\pm$ 0.0898 |
| ADNIC                                  | 10    | 88.99 $\pm$ 2.48 | 0.7912 $\pm$ 0.0524 | 0.5607 $\pm$ 0.1280 |

Table S2: Expanded baseline comparison on the held-out test split

| Method                         | Overall Acc. (%) | Macro F1 | Period 3 F1 |
|--------------------------------|------------------|----------|-------------|
| Cross-entropy                  | 83.33            | 0.7578   | 0.5714      |
| Weighted cross-entropy         | 86.11            | 0.7889   | 0.6154      |
| Oversampling + cross-entropy   | 90.28            | 0.8132   | 0.6000      |
| Feature-space SMOTE            | 77.78            | 0.6354   | 0.3077      |
| Fixed Focal Loss               | 90.28            | 0.8600   | 0.7692      |
| Adaptive Focal Loss            | 91.67            | 0.8870   | 0.8333      |
| Contrastive branch only        | 87.50            | 0.7980   | 0.6154      |
| Single-stage contrastive ADNIC | 88.89            | 0.8662   | 0.8571      |

Table S3: Component ablation on the held-out test split

| Variant                                    | Overall Acc. (%) | Macro F1 | Period 3 F1 |
|--------------------------------------------|------------------|----------|-------------|
| A1: cross-entropy                          | 83.33            | 0.7578   | 0.5714      |
| A2: fixed Focal Loss                       | 90.28            | 0.8600   | 0.7692      |
| A3: adaptive Focal Loss                    | 91.67            | 0.8870   | 0.8333      |
| A4: contrastive branch only                | 87.50            | 0.7980   | 0.6154      |
| A5: single-stage contrastive ADNIC         | 88.89            | 0.8662   | 0.8571      |
| A6: default ADNIC                          | 84.72            | 0.7117   | 0.4000      |
| A7: ADNIC without Stage 2 contrastive term | 83.33            | 0.7086   | 0.4444      |
| A8: ADNIC with 50/50 stage allocation      | 87.50            | 0.8118   | 0.6667      |

Table S4: Five-fold cross-validation results

| Method              | Folds | Overall Acc. (%) | Macro F1            | Period 3 F1         |
|---------------------|-------|------------------|---------------------|---------------------|
| Cross-entropy       | 5     | 92.40 $\pm$ 0.84 | 0.8541 $\pm$ 0.0391 | 0.6907 $\pm$ 0.1075 |
| Adaptive Focal Loss | 5     | 91.23 $\pm$ 1.03 | 0.8508 $\pm$ 0.0211 | 0.7075 $\pm$ 0.0561 |
| ADNIC               | 5     | 91.23 $\pm$ 1.88 | 0.8344 $\pm$ 0.0602 | 0.6536 $\pm$ 0.1840 |

Table S5: Backbone comparison under the ADNIC training protocol

| Backbone         | Params (M) | Overall Acc. (%) | Macro F1 | Period 3 F1 |
|------------------|------------|------------------|----------|-------------|
| ResNet50         | 23.5       | 86.11            | 0.7932   | 0.6667      |
| EfficientNetV2-S | 20.2       | 84.72            | 0.7802   | 0.6250      |
| ConvNeXt-Tiny    | 27.8       | 59.72            | 0.2493   | 0.0000      |
| ViT-B/16         | 85.8       | 61.11            | 0.4563   | 0.1667      |
| Swin-T           | 27.5       | 59.72            | 0.2493   | 0.0000      |

Table S6: Optimisation validation of ADNIC variants across five repeated seeds

| Variant                                                | Seeds | Overall Acc. (%) | Macro F1            | Period 3 F1         |
|--------------------------------------------------------|-------|------------------|---------------------|---------------------|
| Adaptive focal, $\gamma = 1.5$                         | 5     | 85.51 $\pm$ 2.90 | 0.7502 $\pm$ 0.0654 | 0.5105 $\pm$ 0.1690 |
| Single-stage ADNIC-lite, $\gamma = 1.5$                | 5     | 83.19 $\pm$ 3.01 | 0.6979 $\pm$ 0.0442 | 0.3841 $\pm$ 0.0978 |
| Two-stage ADNIC, 50/50, $\beta = 0.7$ , $\gamma = 1.5$ | 5     | 88.12 $\pm$ 2.59 | 0.7936 $\pm$ 0.0538 | 0.5910 $\pm$ 0.1518 |
| Two-stage ADNIC, 50/50, $\beta = 0.7$ , $\gamma = 2.0$ | 5     | 87.83 $\pm$ 2.63 | 0.7901 $\pm$ 0.0591 | 0.5850 $\pm$ 0.1609 |

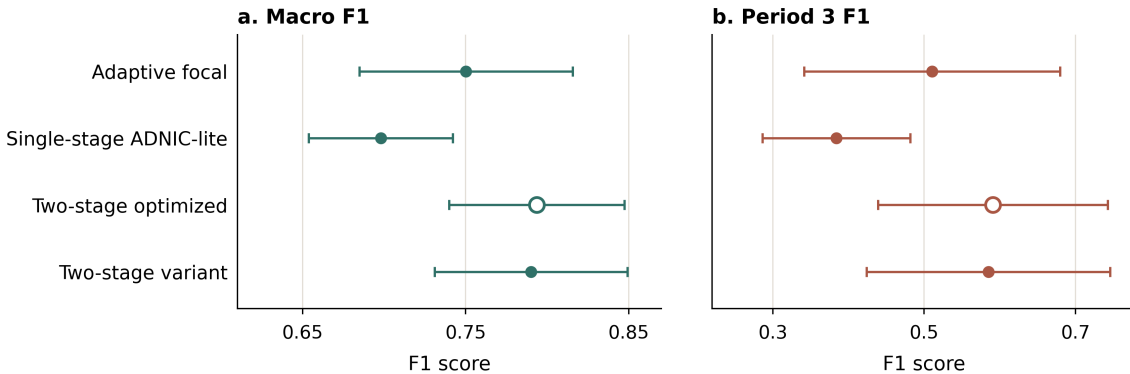

Figure S1: Visual summary of optimisation-validation variants. Points and error bars show mean  $\pm$  SD across five repeated seeds. Open markers indicate the best variant in each panel. The corresponding numerical values and parameter settings are reported in Table S6.

Table S7: Stage-ratio sensitivity on the held-out test split

| Stage allocation | Overall Acc. (%) | Macro F1 | Period 3 F1 |
|------------------|------------------|----------|-------------|
| 30/70            | 83.33            | 0.7230   | 0.4615      |
| 40/60            | 84.72            | 0.7117   | 0.4000      |
| 50/50            | 87.50            | 0.8118   | 0.6667      |
| 60/40            | 87.50            | 0.8118   | 0.6667      |

Table S8: Stage 2 contrastive-weight sensitivity on the held-out test split

| $\beta$ | <b>Overall Acc. (%)</b> | <b>Macro F1</b> | <b>Period 3 F1</b> |
|---------|-------------------------|-----------------|--------------------|
| 0.0     | 83.33                   | 0.7086          | 0.4444             |
| 0.05    | 83.33                   | 0.7230          | 0.4615             |
| 0.1     | 84.72                   | 0.7117          | 0.4000             |
| 0.2     | 83.33                   | 0.7230          | 0.4615             |
| 0.3     | 83.33                   | 0.7230          | 0.4615             |
| 0.5     | 83.33                   | 0.7230          | 0.4615             |
| 0.7     | 90.28                   | 0.8583          | 0.7500             |
| 1.0     | 86.11                   | 0.7984          | 0.6667             |

Table S9: Focal-loss focusing-parameter sensitivity on the held-out test split

| $\gamma$ | <b>Overall Acc. (%)</b> | <b>Macro F1</b> | <b>Period 3 F1</b> |
|----------|-------------------------|-----------------|--------------------|
| 0.5      | 90.28                   | 0.8660          | 0.7692             |
| 1.0      | 90.28                   | 0.8845          | 0.8750             |
| 1.5      | 93.06                   | 0.9218          | 0.9231             |
| 2.0      | 90.28                   | 0.8600          | 0.7692             |
| 2.5      | 87.50                   | 0.7879          | 0.6000             |
| 3.0      | 87.50                   | 0.8627          | 0.8571             |
| 3.5      | 90.28                   | 0.8974          | 0.9231             |
| 4.0      | 87.50                   | 0.8209          | 0.7143             |

Table S10: Contrastive temperature sensitivity on the held-out test split

| $\tau$ | <b>Overall Acc. (%)</b> | <b>Macro F1</b> | <b>Period 3 F1</b> |
|--------|-------------------------|-----------------|--------------------|
| 0.03   | 86.11                   | 0.7407          | 0.4615             |
| 0.05   | 81.94                   | 0.6390          | 0.2222             |
| 0.07   | 87.50                   | 0.7771          | 0.5455             |
| 0.10   | 87.50                   | 0.7419          | 0.4444             |
| 0.15   | 90.28                   | 0.8314          | 0.6667             |
| 0.20   | 86.11                   | 0.7529          | 0.5000             |
| 0.25   | 90.28                   | 0.8120          | 0.6000             |
| 0.30   | 84.72                   | 0.7700          | 0.6154             |
